# Supplementary material for: In situ construction of multifunctional Li2Si2O5/LiAlSiO4/C networks on micron silicon anodes for high initial coulombic efficiency
Source: Royal Society of Chemistry journal article supplement (doi:10.1039/d6ra02190e), 2026-05-26
Supplement: d6ra02190e1.pdf [file d6ra02190e1.pdf]

# *In-situ* Construction of Multifunctional $\text{Li}_2\text{Si}_2\text{O}_5/\text{LiAlSiO}_4/\text{C}$ Networks on Micron Silicon Anodes for High Initial Coulombic Efficiency

Jingyu Yang, Xikai Zhou and Junfeng Rong\*

Sinopec Research Institute of Petroleum Processing Co., Ltd. Beijing, 100083, PR China

\* Corresponding author: Rongjunfeng.ripp@sinopec.com

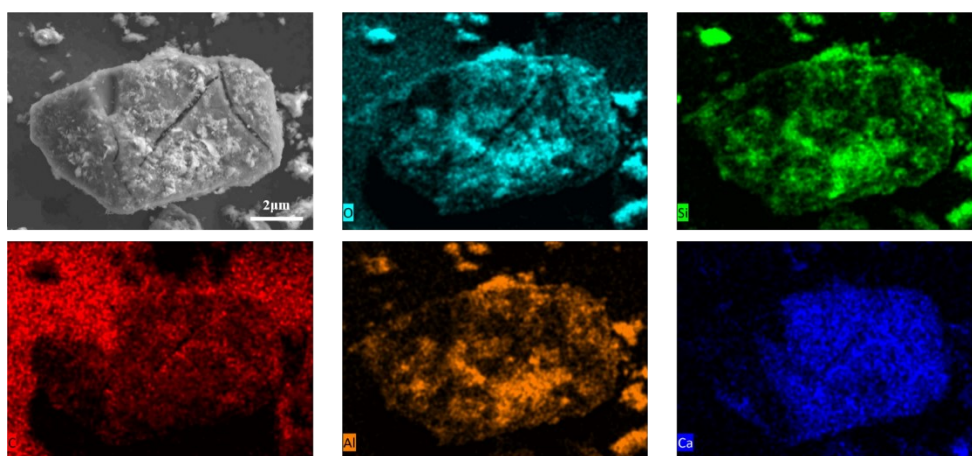

Fig.S1:EDS mapping of CSA.

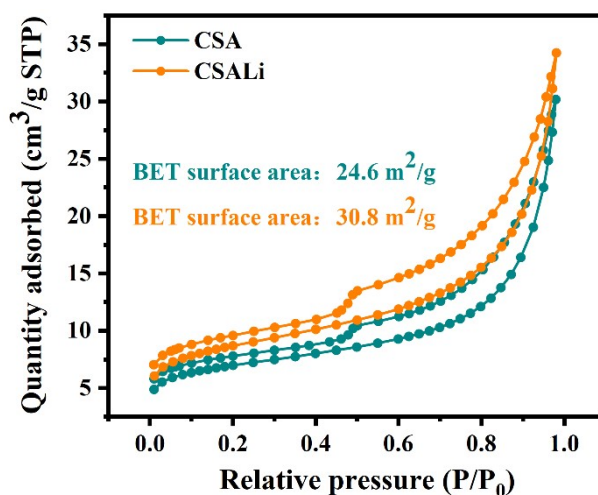

Fig.S2: BET of CSA and CSALi.

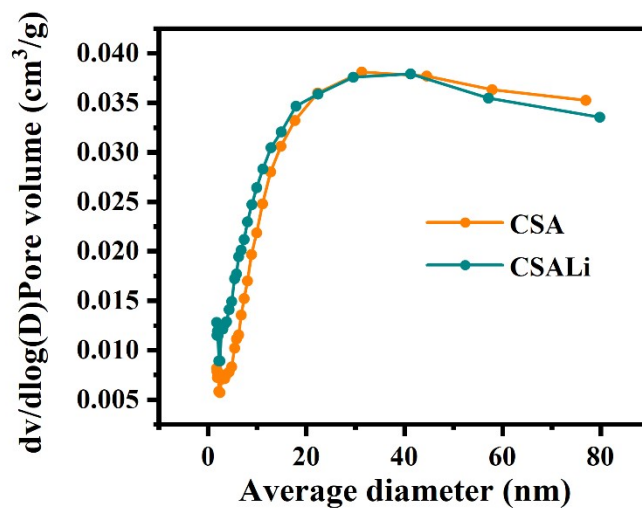

Fig.S3: Pore volume of CSA and CSALi.

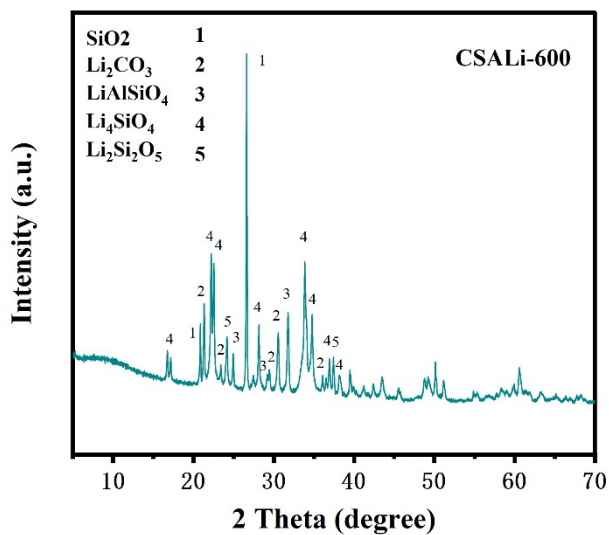

Fig.S4: XRD of CSALi (Excessive Li).

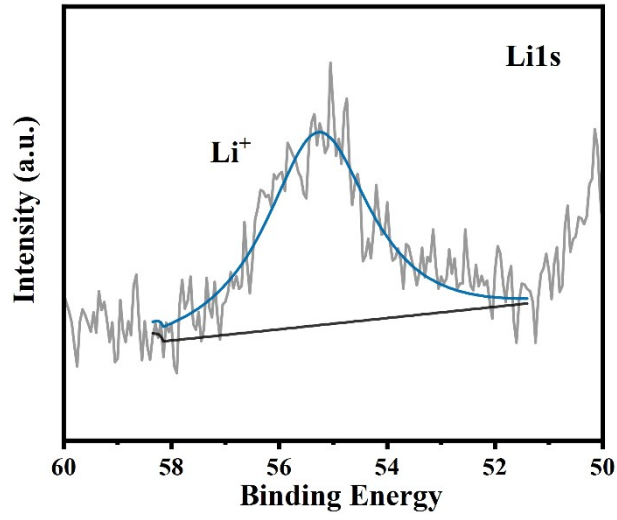

Fig.S5: Li1s of CLS12-1000.

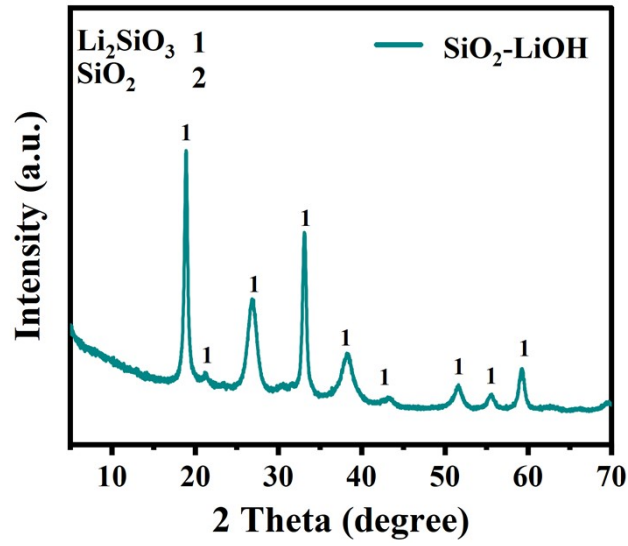

Fig.S6: XRD of pre-ball-milling SiO<sub>2</sub> and LiOH sample.
